# Supplementary material for: Binocular visual deficits at mid to high spatial frequency in treated amblyopes
Source: PubMed Central journal article supplement — iScience. 2021 Jun 12;24(7):102727. doi: 10.1016/j.isci.2021.102727 (PMC8254032; doi:10.1016/j.isci.2021.102727), 2021-06-12
Supplement: mmc1.pdf [file mmc1.pdf]

**iScience, Volume 24**

**Supplemental information**

**Binocular visual deficits at mid to high  
spatial frequency in treated amblyopes**

**Shijia Chen, Seung Hyun Min, Ziyun Cheng, Yue Xiong, Xi Yu, Lili Wei, Yu Mao, Robert F. Hess, and Jiawei Zhou**

1 Table S1. [P-values (with Bonferroni correction) and effect sizes (Cohen's d) for each pairwise  
 2 comparison], related to Figure 3 and Figure 5", "Table S2. [Clinical details of the treated  
 3 amblyopes], related to STAR Methods.  
 4

5 **Table S1. P-values (with Bonferroni correction) and effect sizes (Cohen's d) for each**  
 6 **pairwise comparison**

| Objective         | Experiment                              | Spatial frequency (c/d) | p value | Cohen's d |
|-------------------|-----------------------------------------|-------------------------|---------|-----------|
| Treated amblyopes | Experiment 1:  logBP                    | 0.5 vs 1                | < 0.001 | 1.77      |
|                   |                                         | 0.5 vs 2                | < 0.001 | 3.75      |
|                   |                                         | 0.5 vs 4                | < 0.001 | 5.26      |
|                   |                                         | 0.5 vs 8                | < 0.001 | 5.39      |
| Treated amblyopes | Experiment 2: visibility-matched  logBP | 0.5 vs 1                | 1.000   | 0.43      |
|                   |                                         | 0.5 vs 2                | 0.293   | 1.94      |
|                   |                                         | 0.5 vs 4                | 0.004   | 5.98      |
|                   |                                         | 0.5 vs 8                | 0.001   | 7.04      |

7

8 **Table S2. Clinical details of the treated amblyopes.**

| Subject | Age/Sex | Type  | Refraction<br>OD/OS                                | VA<br>(logMAR)<br>OD/OS | Strabismus<br>(pd) | RDS<br>(arc<br>seconds) | History                                                                                                                   |
|---------|---------|-------|----------------------------------------------------|-------------------------|--------------------|-------------------------|---------------------------------------------------------------------------------------------------------------------------|
| A1      | 19/F    | Aniso | +0.50DS/-<br>0.50DC*180<br>-2.75DS/-<br>0.50DC*180 | 0.10<br>0               | ∅                  | 400                     | Detected at 9 years old,<br>glasses and patching since<br>after, normal at 10 years<br>old                                |
| A2      | 22/M    | Aniso | +0.25DS/-<br>1.25DC*70<br>-0.75DS/-<br>0.75DC*180  | 0.08<br>-0.08           | ∅                  | 200                     | Detected at 16 years old,<br>glasses since after,<br>received laser surgery at<br>17 years old, normal at 18<br>years old |
| A3      | 20/F    | Aniso | +1.00DS/-<br>0.25DC*132<br>-3.25DS/-<br>0.25DC*135 | 0<br>-0.06              | ∅                  | 400                     | Detected at 5 years old,<br>glasses and patching since<br>after, normal at 7 years old                                    |
| A4      | 20/F    | Aniso | +7.50DS/-<br>2.50DC*175<br>+0.25DS/-<br>0.50DC*160 | 0<br>-0.10              | ∅                  | 400                     | Detected at 4 years old,<br>glasses and patching since<br>after, normal at 6 years old                                    |

|     |      |       |                                                     |             |   |     |                                                                                                                          |
|-----|------|-------|-----------------------------------------------------|-------------|---|-----|--------------------------------------------------------------------------------------------------------------------------|
| A5  | 19/M | Aniso | +5.00DS/-<br>1.25DC*180<br>plano                    | 0.08<br>0   | ∅ | 400 | Detected at 12 years old, glasses, patching, bead-threading and red filter treatment since after, normal at 13 years old |
| A6  | 32/F | Aniso | +2.25DS/-<br>2.00DC*180<br>plano                    | 0.10<br>0   | ∅ | 400 | Detected at 8 years old, glasses since after, normal at 10 years old                                                     |
| A7  | 22/F | Aniso | -6.75DS/-<br>0.50DC*85<br>-5.50DS/-<br>1.50DC*170   | 0.1<br>-0.1 | ∅ | 200 | Detected at 13 years old, patching since after, normal at 14 years old                                                   |
| A8  | 25/F | Aniso | +4.00DS/-<br>2.50DC*5<br>-1.50DS/-<br>2.00DC*165    | 0.1<br>0    | ∅ | 400 | Detected at 9 years old, glasses, patching and bead-threading since after, normal at 12 years old                        |
| A9  | 27/M | Aniso | +2.25DS/-<br>4.755DC*180<br>-4.00DS/-<br>1.00DC*170 | 0<br>0      | ∅ | 200 | Detected at 15 years old, glasses since after, normal at 17 years old                                                    |
| A10 | 20/F | Mixed | -1.5DS/-<br>4.50DC*180<br>+1.00DS/-<br>6.50DC*175   | 0<br>0      | ∅ | 200 | Detected at 10 years old, strabismus surgery at 10 years old, patching, normal at 20 years old                           |

9 VA, vision acuity; OD, right eye; OS, left eye; Anis, anisometropia; Mixed: strabismus +  
10 anisometropia; RDS, randot stereoacuity; \*, axial astigmatism. (i) Participants' best spectacle-  
11 corrected visual acuity was measured on the basis of the ETDRS at 4 m; (ii) all subjects accepted  
12 treatment immediately after diagnosis.  
13
